# Supplementary material for: Outbreak of Parasitic Dinoflagellate Piscinoodinium sp. Infection in an Endangered Fish from India: Arulius Barb (Dawkinsia arulius)
Source: MDPI journal article supplement (doi:10.3390/pathogens11111350), 2022-11-14
Supplement: s1 [file s1]

**Table S1: Nucleotide sequence information of rDNA complex region of *Piscinoodinium* sp. generated in the present experiment.**

**>Present experiment**

CTGGTGATCCTGCCAGTAGTCATATGCTTGTCTCAAAGATTAAGCCATGCATGTCTCAGCATAAGCCTTCATAT  
GGTGAAGCTGCGAATGGCTCATTAAAGCAGTTATAATTTATTTGATGGTCACTGTTACATGGATAACTGTGGT  
AATTCTAGAGCTAATACATGCATCAAAACCCGACCTCTTGAAGGGTTGTGTTTATTAGGTACAAAACCAACCC  
AAGTTCGCTTGTTCTCTGGTGATTTATGATAACTGAATGAATTGTATGGCATTAGCCGATGATACTTCATTCA  
AGTTTCTGACCTATCAGCTTCCGACGGTAGGGTATTGGCCTACCGTGGCAATGACGGGTAAACGGAGAATTAG  
GGTTTGATTCCGGAGAGGGAGCCTGAGAAACGGCTACCACATCTAAGGAAGGCAGCAGGCGCGCAAATTAC  
CCAATCCTGACATAGGGAGGTAGTGACAAGAAATAACAATACAGGGCATCCATGTCTTGTAATTGGAATGAA  
TAGAATTTAAATCCCTTTATGAGTATCAATTGGAGGGCAAGTCTGGTGCCAGCAGCCGCGGTAATTCCAGCTC  
CAATAGCGTATATTAAAGTTGTTGCGGTTAAAAAGCTCGTAGTTGGACTTCTGCTGAAAAATGACTGGTCCGC  
CCTCTGAGCAGGTATCAGGTTGAGCTTTGGCATCTTCTTAAAAGAGCGCGTCTGCACTTTGATTGTGTGGTGCG  
GTATTTAAGACATTTACTTTGAAGAAATTAGAGTGTTCAGCAAGCGCACGCTTTGAATACATTAGCATGGA  
ATAATAAGATAGGACCTCAATTCTATTTTGTGGTTTCTAGAAGTGAAGTAATGATTGATAGGGATAGTTGGG  
GGCATTGCTATTTAATTGTCAGAGGTGAAATTCTGGATTTATTAAGACGGACTACTGCGAAAGCATTGCGCA  
AGGATGTTTTATTGACCAAGAACGAAAGTTAGGGGATCGAAGACGATCAGATACCGTCCTAGTCTTAACCAT  
AACTATGCCGACTAGAGATTGAAGGTCGTTACTTGACGACTCCTTCAGCACCTTATGAGAAATCAAAGTCTT  
TAGGTTCCGGGGGGAGTATGGTCGCAAGGCTGAACTTAAAGGAATTGACGGAAGGGCACCACCAGGAGTG  
GAGCCTGCGGCTTAATTTGACTCAACACGGGGAACTTACCAGGTCCAGACATAGTAGGGATTGACAGATTG  
AAAGCTCTTTCTGATTCTATGGGTGGTGGTGCATGGCCGTTCTAGTTGGTGGAGTGATTGTCTGGTTAATT  
CCGTTAACGAACGAGACCTTAACCTGCTAAATAGTTACATGTAATTTGCGTTACATGGGCAGCTCCTTAGAGG  
GACTTTGTGTGTCTAATGCAAGGAAGTTTGAGGCAATAACAGGTCTGTGATGCCCTTAGATGTCTGGGCTGC  
ACGCGCGCTACACTGATGCATTCAACGAGTTATGACCTTGCCTGAAAGGGTTGGGTAATCTTTTTAAATTGCAT  
CGTGATGGGGATAGATCATTGCAATTATTGATCTTCAACGAGGAATTCCTAGTAAGCGCGAGTCATCAGCTCG  
TGCTGATTACGTCCCTGCCCTTTGTACAAGCCGCCGTCGCTCTACCGATTGAGTGATCCGGTGAATAATTCA  
GACTGATTCAGTGCTCAGCTTCTGGATACTGCGTCGGAAAGTCTAGTGAACCTTATCACTTAGAGGAAGGAGA  
AGTCGTAACAAGGTTTCCGTAGGTGAACCTGCGGAAGGATCATTCGCAATCCATTCAACTCACTGTGAATG  
TAACTGGTAAATGGATGTGGGTAGATGGATGTTTTGAAACACTTCCTGCTTGCAACCATTGCGGGTGGCAA  
AGCAAAGTCTGCTGCTGCTGGGCGGTTTTGTTCTGCTGCCATTAGATTGTTTTGCAATCTAATTAATCTAAGT  
TTTGAAGCAGTATCTAAACAAATTCAACTTTCAGCGATGGATATCTCGGCTCAAACATCGATAAAGGGCGCA  
GCAAAGTGTGATAATCATTGTGAATTGCAGAATTCCGTGAACCAATTGACTTTTGAATGTATATTACACTTCTG  
GGTTATCCCTGGATGTTTCATCTGCTTCAGTGCTTTGTGTTTCAATAATTTATGAATTGTGTTGTGAGCTATC  
AGAAGCATACTAGCTTGTGGTGGCACATCAAAGATAGTTGGTTCATCAGCAACGTTTGTGCAAGTGTTAGC  
AATAAGGCATCAACTTGCAATAGGCTGCTGGGACAAAACAATATCACAGCATGAATGCAGGTTA

| Nucleotide position | Name of the gene                 | Remarks       | Accession number |
|---------------------|----------------------------------|---------------|------------------|
| 1 – 1801 bp         | Small subunit ribosomal RNA gene | SSU rRNA gene | OP452934         |
| 1802 – 2000 bp      | Internal transcribed spacer 1    | ITS region    | OP420760         |
| 2001 – 2162 bp      | 5.8S ribosomal RNA               |               |                  |
| 2163 – 2314 bp      | Internal transcribed spacer 2    |               |                  |
| 2315 – 2334 bp      | Large subunit ribosomal RNA      | LSU rRNA gene | Not submitted    |
