# Supplementary material for: Outbreak of Parasitic Dinoflagellate Piscinoodinium sp. Infection in an Endangered Fish from India: Arulius Barb (Dawkinsia arulius)
Source: MDPI journal article supplement (doi:10.3390/pathogens11111350), 2022-11-14
Supplement: s1 [file s1]

**Figure S1: Detection and amplification of rDNA complex region of *Piscinoodinium sp.* by PCR**

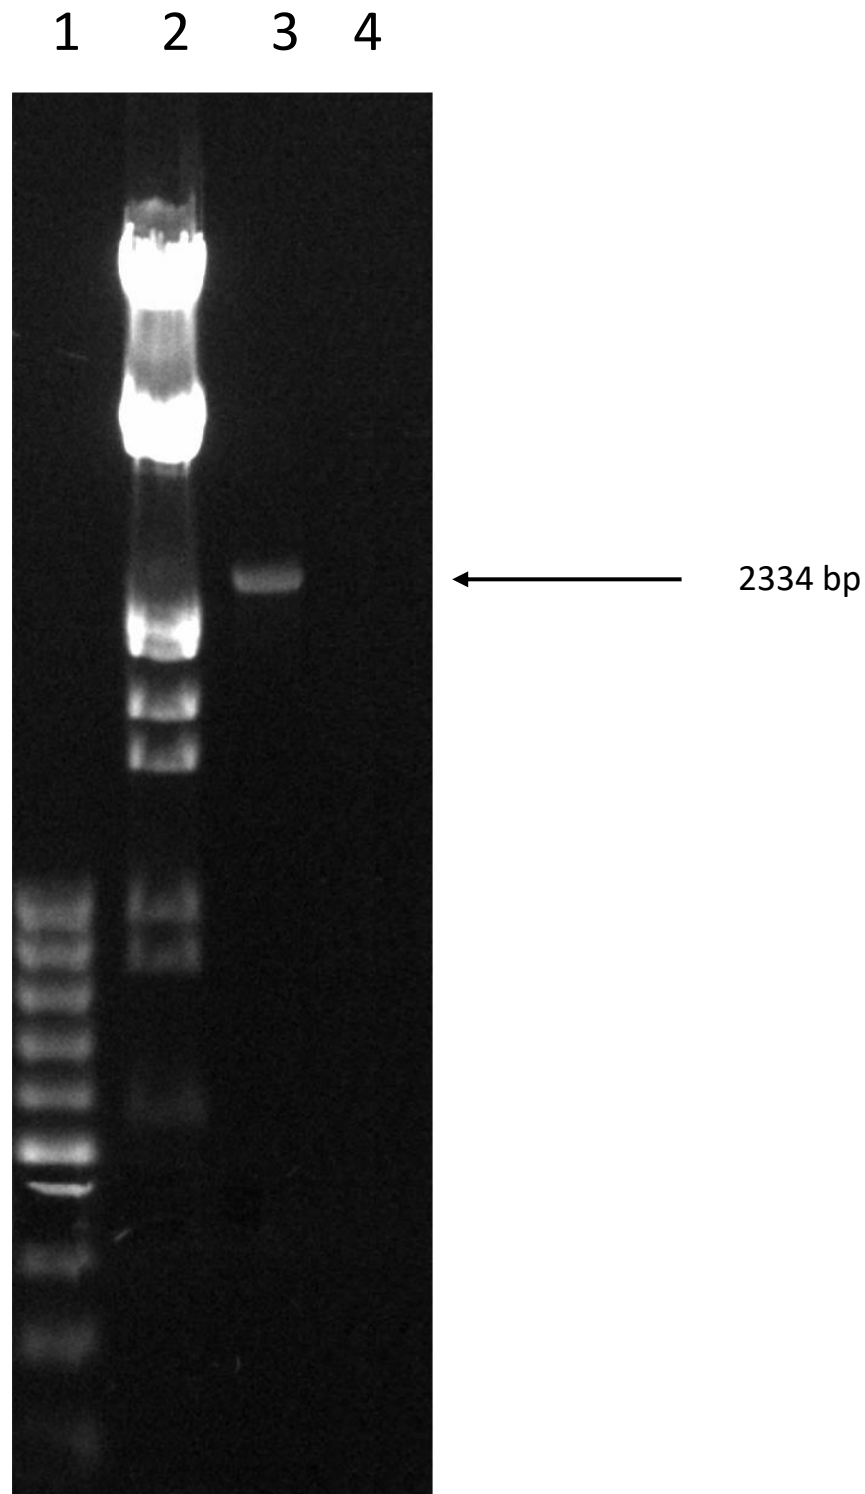

Lane 1 – 100 bp marker

Lane 2 – Lambda DNA/EcoR I/Hind III Double Digest marker

Lane 3 - *Piscinoodinium sp.* collected from the gill of *Arulius barb*

Lane 4 – Non-template control
